# Supplementary material for: The chemical roots of the matching polynomial
Source: Royal Society of Chemistry journal article supplement (doi:10.1039/b923893j), 2010-01-01
Supplement: b923893j.pdf [file b923893j.pdf]

# The chemical roots of the matching polynomial

Remi Chauvin,<sup>[a,b],\*</sup> Christine Lepetit,<sup>[a,b]</sup> Patrick W. Fowler,<sup>†</sup> Jean-Paul Malrieu.<sup>‡</sup>

<sup>[a]</sup>CNRS ; LCC (Laboratoire de Chimie de Coordination) ; 205, route de Narbonne, F-31077  
Toulouse, France. Fax: (+33)5 61 55 30 03. E-mail: chauvin@lcc-toulouse.fr. <sup>[b]</sup>Université de  
Toulouse ; UPS, INPT ; LCC ; F-31077 Toulouse, France. <sup>†</sup>*Department of Chemistry, University of  
Sheffield, Sheffield S3 7HF, U.K., and* <sup>‡</sup>*Laboratoire de Chimie et Physique Quantiques IRSAMC,  
UMR 5626 CNRS, 118 route de Narbonne, 31062, Toulouse cedex 09, France.*

## Supplementary Information

### List of content :

**Page 2 :** Table S1

**Page 4 :** Table S2

|                                                                                     | $P^0(x)$                   | $P^1(x)$                   | $P^{ac}(x)$             | TRE*   |
|-------------------------------------------------------------------------------------|----------------------------|----------------------------|-------------------------|--------|
| 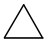   | $x^3-3x-2$                 | $x^3-3x+2$                 | $x^3-3x$                | -0.464 |
| 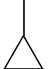   | $x^4-4x^2-2x+1$            | $x^4-4x^2+2x+1$            | $x^4-4x^2+1$            | -0.063 |
| 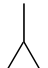   | $x^5-5x^3-2x^2+3x$         | $x^5-5x^3+2x^2+3x$         | $x^5-5x^3+3x$           | 0.023  |
| 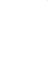   | $x^6-6x^4-2x^3+6x^2-1$     | $x^6-6x^4+2x^3+6x^2-1$     | $x^6-6x^4+6x^2-1$       | 0.009  |
| 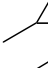   | $x^5-5x^3-2x^2+4x+2$       | $x^5-5x^3+2x^2+4x-2$       | $x^5-5x^3+4x$           | -0.111 |
| 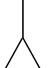   | $x^6-6x^4-2x^3+7x^2+4x$    | $x^6-6x^4+2x^3+7x^2-4x$    | $x^6-6x^4+7x^2$         | 0.471  |
| 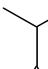   | $x^6-6x^4-2x^3+8x^2+4x-1$  | $x^6-6x^4+2x^3+8x^2-4x-1$  | $x^6-6x^4+8x^2-1$       | 0.103  |
| 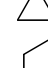   | $x^6-6x^4-2x^3+7x^2+2x-1$  | $x^6-6x^4+2x^3+7x^2-2x-1$  | $x^6-6x^4+7x^2-1$       | 0.045  |
| 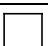 | $x^4-4x^2$                 | $x^4-4x^2+4$               | $x^4-4x^2+2$            | -1.226 |
| 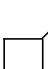 | $x^5-5x^3+2x$              | $x^5-5x^3+6x$              | $x^5-5x^3+4x$           | -0.404 |
| 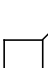 | $x^6-6x^4+5x^2-1$          | $x^6-6x^4+9x^2-1$          | $x^6-6x^4+7x^2-1$       | -0.163 |
| 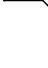 | $x^6-6x^4+5x^2$            | $x^6-6x^4+9x^2$            | $x^6-6x^4+7x^2$         | -0.248 |
| 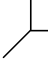 | $x^8-8x^6+14x^4-8x^2+1$    | $x^8-8x^6+18x^4-8x^2+1$    | $x^8-8x^6+16x^4-8x^2+1$ | -0.072 |
| 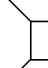 | $x^6-6x^4+6x^2$            | $x^6-6x^4+10x^2-4$         | $x^6-6x^4+8x^2-2$       | -1.060 |
| 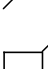 | $x^7-7x^5+10x^3$           | $x^7-7x^5+14x^3-8x$        | $x^7-7x^5+12x^3-4x$     | -1.124 |
| 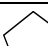 | $x^5-5x^3+5x-2$            | $x^5-5x^3+5x+2$            | $x^5-5x^3+5x$           | -0.301 |
| 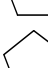 | $x^6-6x^4+8x^2-2x-1$       | $x^6-6x^4+8x^2+2x-1$       | $x^6-6x^4+8x^2-1$       | 0.020  |
| 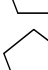 | $x^7-7x^5+13x^3-2x^2-6x+2$ | $x^7-7x^5+13x^3+2x^2-6x-2$ | $x^7-7x^5+13x^3-6x$     | -0.150 |
| 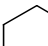 | $x^6-6x^4+9x^2-4$          | $x^6-6x^4+9x^2$            | $x^6-6x^4+9x^2-2$       | 0.273  |

|                                                                                   |                                                                                           |                                                                                          |                                                                                           |        |
|-----------------------------------------------------------------------------------|-------------------------------------------------------------------------------------------|------------------------------------------------------------------------------------------|-------------------------------------------------------------------------------------------|--------|
| 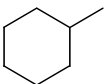 | $x^7 - 7x^5 + 13x^3 - 7x$                                                                 | $x^7 - 7x^5 + 13x^3 - 3x$                                                                | $x^7 - 7x^5 + 13x^3 - 5x$                                                                 | 0.155  |
| 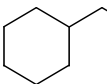 | $x^8 - 8x^6 + 19x^4 - 16x^2 + 4$                                                          | $x^8 - 8x^6 + 19x^4 - 12x^2$                                                             | $x^8 - 8x^6 + 19x^4 - 14x^3 + 2$                                                          | 0.249  |
| 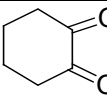 | $x^8 - 0.44x^7 - 7.912x^6 + 3.071x^5 + 17.511x^4 - 5.685x^3 - 12.327x^2 + 3.054x + 0.767$ | $x^8 - 0.44x^7 - 7.912x^6 + 3.071x^5 + 17.511x^4 - 5.685x^3 - 8.327x^2 + 1.293x + 0.961$ | $x^8 - 0.44x^7 - 7.912x^6 + 3.071x^5 + 17.511x^4 - 5.685x^3 - 10.327x^2 + 2.174x + 0.864$ | 0.053  |
| 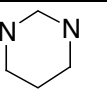 | $x^6 - 0.76x^5 - 3.816x^4 + 2.265x^3 + 3.372x - 1.117x - 0.96$                            | $x^6 - 0.76x^5 - 3.816x^4 + 2.265x^3 + 3.372x - 1.117x$                                  | $x^6 - 0.76x^5 - 3.815x^4 + 2.267x^3 + 3.370x - 1.118x - 0.48$                            | 0.193  |
| 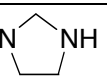 | $x^5 - 1.88x^4 - 3.03x^3 + 3.966x^2 - 1.92x - 1.837$                                      | $x^5 - 1.88x^4 - 3.03x^3 + 3.966x^2 + 1.92x - 0.249$                                     | $x^5 - 1.88x^4 - 3.03x^3 + 3.964x^2 - 1.92x - 1.043$                                      | 0.196  |
| 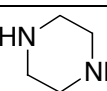 | $x^6 - 3x^5 - 2.99x^4 + 10.86x^3 + 2.364x^2 - 7.86x - 0.374$                              | $x^6 - 3x^5 - 2.99x^4 + 10.86x^3 + 2.364x^2 - 7.86x + 2.25$                              | $x^6 - 3x^5 - 2.99x^4 + 10.86x^3 + 2.364x^2 - 7.86x - 0.938$                              | -0.132 |

**Table S1.** Characteristic and acyclic polynomials of some Hückel and Möbius unicycles with ring size 3-6. The *o*-benzoquinone,<sup>1</sup> 1,4-dihydropyrazine,<sup>2</sup> 1,3-pyrimidine and imidazole graphs are here weighted by the Hess-Schaad parameters:  $h_{O\bullet} = 0.22$ ,  $k_{C-O\bullet} = 0.99$ ,<sup>3</sup>  $h_{N\bullet} = 0.38$ ,  $k_{C-N\bullet} = 0.70$ ,<sup>4</sup>  $h_{N\bullet} = 1.50$ ,  $k_{C-N\bullet} = 0.90$ .<sup>5</sup> \* TRE values for the neutral ground state (in  $\beta$  units).

<sup>1</sup> J. Aihara, *J. Am. Chem. Soc.*, 1976, **98**, 2750-2758.

<sup>2</sup> J. Aihara, H. Ichikawa, *Bull. Chem. Soc. Jpn.*, 1988, **61**, 223-228.

<sup>3</sup> B. A. Hess, Jr, L. J. Schaad, C. W. Holyoke, Jr. *Tetrahedron*, 1972, **28**, 5299.

<sup>4</sup> B. A. Hess, Jr, L. J. Schaad, C. W. Holyoke, Jr. *Tetrahedron*, 1975, **31**, 295.

<sup>5</sup> B. A. Hess, Jr, L. J. Schaad, C. W. Holyoke, Jr. *Tetrahedron*, 1972, **28**, 3657.

|                                                                                     | Hückel and Möbius characteristic polynomials                                                                                                                                                                                                               | Acyclic polynomial                                                    |
|-------------------------------------------------------------------------------------|------------------------------------------------------------------------------------------------------------------------------------------------------------------------------------------------------------------------------------------------------------|-----------------------------------------------------------------------|
| 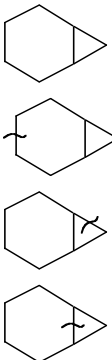   | $P^0(x) = x^7 - 8x^5 - 2x^4 + 17x^3 + 6x^2 - 10x - 4$<br>$P^1(x) = x^7 - 8x^5 - 2x^4 + 17x^3 + 6x^2 - 6x$<br>$P^2(x) = x^7 - 8x^5 + 2x^4 + 17x^3 - 6x^2 - 10x + 4$<br>$P^3(x) = x^7 - 8x^5 + 2x^4 + 17x^3 - 6x^2 - 6x$                                     | $P^{ac}(x) = x^7 - 8x^5 + 17x^3 - 8x$                                 |
| 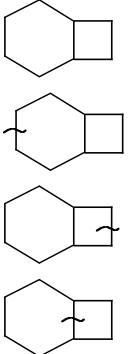  | $P^0(x) = x^8 - 9x^6 + 22x^4 - 16x^2 + 1$<br>$P^1(x) = x^8 - 9x^6 + 22x^4 - 12x^2 + 1$<br>$P^2(x) = x^8 - 9x^6 + 26x^4 - 28x^2 + 9$<br>$P^3(x) = x^8 - 9x^6 + 26x^4 - 24x^2 + 1$                                                                           | $P^{ac}(x) = x^8 - 9x^6 + 24x^4 - 20x^2 + 3$                          |
| 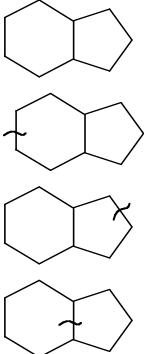 | $P^0(x) = x^9 - 10x^7 + 32x^5 - 2x^4 - 39x^3 + 6x^2 + 15x - 4$<br>$P^1(x) = x^9 - 10x^7 + 32x^5 - 2x^4 - 35x^3 + 6x^2 + 7x$<br>$P^2(x) = x^9 - 10x^7 + 32x^5 + 2x^4 - 39x^3 - 6x^2 + 15x + 4$<br>$P^3(x) = x^9 - 10x^7 + 32x^5 + 2x^4 - 35x^3 - 6x^2 + 7x$ | $P^{ac}(x) = x^9 - 10x^7 + 32x^5 - 37x^3 + 11x$                       |
| 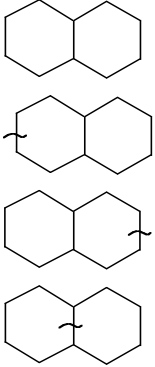 | $P^0(x) = x^{10} - 11x^8 + 41x^6 - 65x^4 + 43x^2 - 9$<br>$P^1(x) = x^{10} - 11x^8 + 41x^6 - 61x^4 + 31x^2 - 1$<br>$P^2(x) = x^{10} - 11x^8 + 41x^6 - 61x^4 + 31x^2 - 1$<br>$P^3(x) = x^{10} - 11x^8 + 41x^6 - 57x^4 + 19x^2 - 1$                           | $P^{ac}(x) = x^{10} - 11x^8 + 41x^6 - 61x^4 + 31x^2 - 3$              |
| 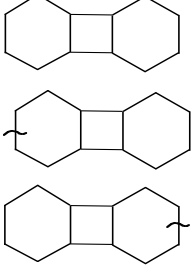 | $P^0(x) = x^{12} - 14x^{10} + 69x^8 - 154x^6 + 162x^4 - 72x^2 + 9$<br>$P^1(x) = x^{12} - 14x^{10} + 69x^8 - 150x^6 + 142x^4 - 48x^2 + 1$<br>$P^2(x) = x^{12} - 14x^{10} + 69x^8 - 150x^6 + 142x^4 - 48x^2 + 1$                                             | $P^{ac}(x) = x^{12} - 14x^{10} + 71x^8 - 162x^6 + 164x^4 - 60x^2 + 5$ |

|                                                                                                                                                                                                                                                                                                                                                                                                                                       |                                                                                                                                                                                                                                                                                                                                                                                                                                      |                                                                                                    |
|---------------------------------------------------------------------------------------------------------------------------------------------------------------------------------------------------------------------------------------------------------------------------------------------------------------------------------------------------------------------------------------------------------------------------------------|--------------------------------------------------------------------------------------------------------------------------------------------------------------------------------------------------------------------------------------------------------------------------------------------------------------------------------------------------------------------------------------------------------------------------------------|----------------------------------------------------------------------------------------------------|
| 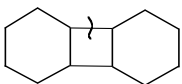<br>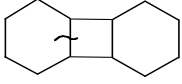<br>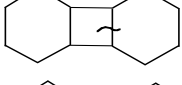<br>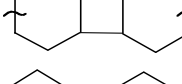<br>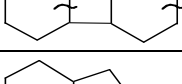 | $P^3(x) = x^{12} - 14x^{10} + 73x^8 - 178x^6 + 214x^4 - 120x^2 + 25$ $P^4(x) = x^{12} - 14x^{10} + 73x^8 - 174x^6 + 186x^4 - 72x^2 + 1$ $P^5(x) = x^{12} - 14x^{10} + 73x^8 - 174x^6 + 186x^4 - 72x^2 + 1$ $P^6(x) = x^{12} - 14x^{10} + 69x^8 - 146x^6 + 122x^4 - 24x^2 + 1$ $P^7(x) = x^{12} - 14x^{10} + 73x^8 - 170x^6 + 158x^4 - 24x^2 + 1$                                                                                     |                                                                                                    |
| 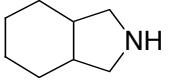<br>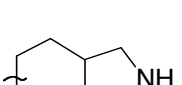<br>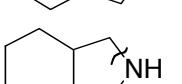<br>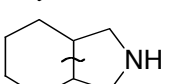                                                                                     | $P^0(x) = x^9 - 1.5x^8 - 9.62x^7 + 12x^6 + 29.34x^5 - 28.619x^4 - 34.059x^3 + 24.360x^2 + 12.339x - 4.74$ $P^1(x) = x^9 - 1.5x^8 - 9.62x^7 + 12x^6 + 29.34x^5 - 28.618x^4 - 30.059x^3 + 18.359x^2 + 5.859x - 1.5$ $P^2(x) = x^9 - 1.5x^8 - 9.62x^7 + 12x^6 + 29.341x^5 - 25.379x^4 - 34.061x^3 + 14.639x^2 + 12.34x + 1.74$ $P^3(x) = x^9 - 1.50x^8 - 9.62x^6 + 12x^6 + 29.338x^5 - 25.381x^4 - 30.057x^3 + 8.640x^2 + 5.859x - 1.5$ | $P^{ac}(x) = x^9 - 1.5x^8 - 9.62x^7 + 12x^6 + 29.34x^5 - 27x^4 - 32.06x^3 + 16.5x^2 + 9.10x - 1.5$ |

**Table S2.** Characteristic and acyclic polynomials of some Hückel and Möbius polycyclic systems. Each Möbius circuit is marked by a tilde: the edge where it is located is weighted by a factor  $-1$ , while all other edges are non-weighted. The isoindole graph is weighted by the Hess-Schaad Hückel parameters:  $h_{N_1} = 1.50$ ,  $k_{C-N_1} = 0.90$ .<sup>4</sup>
